# Supplementary material for: COSMO-CLM Regional Climate Simulations in the CORDEXframework: a review
Source: Copernicus journal article supplement (doi:10.5194/gmd-2020-443), 2021-02-19
Supplement: Supplementary file [file gmd-2020-443-AC1-supplement.pdf]

**Response to Community Comment (CC1) by Jan-Peter Schulz, 03 Mar 2021**  
(<https://doi.org/10.5194/gmd-2020-443-CC1>):

We are very thankful for the comments from Jan-Peter Schulz. A point-by-point response is given below, where for convenience we have copied in the comments followed by our reply (the J-P.S's comments are in blue text).

A few minor comments on: Soerland et al., 2021: COSMO-CLM Regional Climate Simulations in the CORDEX framework: a review

- Line 124: The reference 'Schrodin and Heise' is slightly wrong. The year is 2001, not 2002. The name of the model is TERRA\_LM, not TERRA-ML. Maybe, you say simply TERRA.

Corrected.

- Line 124: Perhaps you could add another reference here, which contains additional characteristics of TERRA which are missing in Schrodin and Heise (2001). This would be Schulz et al. (2016): <https://doi.org/10.1127/metz/2016/0537>

It also has the advantage that it is a peer-reviewed article, not grey literature.

In total:

"... by the soil-vegetation-atmosphere-transfer sub-model TERRA (Schrodin and Heise, 2001; Schulz et al., 2016). ..."

The suggested reference has been included in the revised manuscript.

- Line 137: Add the sentence:

"... (Lawrence and Chase, 2007). Furthermore, activating a formulation of soil thermal conductivity dependent on soil moisture was shown to improve the simulated diurnal cycles of the surface temperature, particularly in arid regions (Schulz et al., 2016). For the first CORDEX ..."

The suggested sentence has been included.

- Line 375: Add reference:

"... Thiery et al., 2016; Schulz et al., 2016). However, ..."

Included.

- Line 1034: Correct reference:

Schrodin and Heise, 2001: TERRA\_LM

Corrected.

- Line 1040: Add reference:

Schulz et al., 2016. <https://doi.org/10.1127/metz/2016/0537>

Included.
